# Supplementary material for: Current and Future Funding Sources for Specialty Mental Health and Substance Abuse Treatment Providers
Source: Atypon-hosted journal article supplement (doi:10.1176/appi.ps.201200298), 2013-03-01
Supplement: 512_ds001.pdf [file 512_ds001.pdf]

**Table 1: Specialty Mental Health and Substance Abuse Providers--Services They Deliver and Populations They Serve**

| Hospital-Based MHA Specialty Providers                                                                                                                                                                                                                                                                                                                                                                                                                                                                                                                                                                                                                                                                                                                                                                                                                                                                                                  |                      |
|-----------------------------------------------------------------------------------------------------------------------------------------------------------------------------------------------------------------------------------------------------------------------------------------------------------------------------------------------------------------------------------------------------------------------------------------------------------------------------------------------------------------------------------------------------------------------------------------------------------------------------------------------------------------------------------------------------------------------------------------------------------------------------------------------------------------------------------------------------------------------------------------------------------------------------------------|----------------------|
| General Hospitals with Specialty Units                                                                                                                                                                                                                                                                                                                                                                                                                                                                                                                                                                                                                                                                                                                                                                                                                                                                                                  | Specialty Hospitals  |
| <p><b>Treatments delivered:</b></p> <ul style="list-style-type: none"> <li>• Short-term hospitalization for stabilizing patients before transitioning them into less intensive care settings</li> <li>• Long-term hospitalizations for patients who are a danger to themselves or others</li> <li>• Long-term hospitalizations for forensic patients referred by the criminal justice system</li> </ul> <p><b>Populations served:</b></p> <ul style="list-style-type: none"> <li>• Individuals in acute crises that may be an imminent danger to themselves or others</li> <li>• Individuals who cannot be safely or effectively treated on an outpatient basis</li> <li>• Individuals eligible for treatment in Department of Veterans Affairs (DVA) hospitals (included with specialty MHA units in general hospitals)</li> <li>• Civilly-committed patients and forensic patients referred by the criminal justice system</li> </ul> |                      |
| Office-Based MHA Specialty Providers                                                                                                                                                                                                                                                                                                                                                                                                                                                                                                                                                                                                                                                                                                                                                                                                                                                                                                    |                      |
| Psychiatrists                                                                                                                                                                                                                                                                                                                                                                                                                                                                                                                                                                                                                                                                                                                                                                                                                                                                                                                           | Other Professionals  |
| <p><b>Treatments delivered:</b></p> <ul style="list-style-type: none"> <li>• Behavioral therapy and/or medication management</li> <li>• Treatment delivered by psychiatrists, psychologists, MH and SA counselors and clinical social workers within the scope of their licenses</li> </ul> <p><b>Populations served:</b></p> <ul style="list-style-type: none"> <li>• Individuals whose conditions can be treated through outpatient care and who usually have private insurance or Medicaid coverage, or who can pay out of pocket for treatment</li> </ul>                                                                                                                                                                                                                                                                                                                                                                           |                      |
| Specialty Center-Based MHA Providers                                                                                                                                                                                                                                                                                                                                                                                                                                                                                                                                                                                                                                                                                                                                                                                                                                                                                                    |                      |
| Specialty MH Centers                                                                                                                                                                                                                                                                                                                                                                                                                                                                                                                                                                                                                                                                                                                                                                                                                                                                                                                    | Specialty SA Centers |
| <p><b>Treatments delivered:</b></p> <ul style="list-style-type: none"> <li>• Individual and group psychotherapy</li> <li>• Psychosocial rehabilitation</li> <li>• Pharmacotherapy</li> <li>• Ambulatory detoxification</li> <li>• Other specialized treatment to vulnerable populations, including those with co-occurring conditions such as HIV/AIDS</li> </ul> <p><b>Populations served:</b></p> <ul style="list-style-type: none"> <li>• Homeless, uninsured, or Medicaid enrollees without access to other specialty outpatient treatment</li> <li>• Persons deinstitutionalized beginning in the early 1970s</li> <li>• Patients in need of long- or short-term residential care in a structured therapeutic behavioral health care program from a multidisciplinary team of professionals</li> </ul>                                                                                                                             |                      |
